# Supplementary figures and images for: Coordination polymers as potential solid forms of drugs: three zinc(ii) coordination polymers of theophylline with biocompatible organic acids
Source: Royal Society of Chemistry journal article supplement (doi:10.1039/c2nj40625j), 2012-10-04

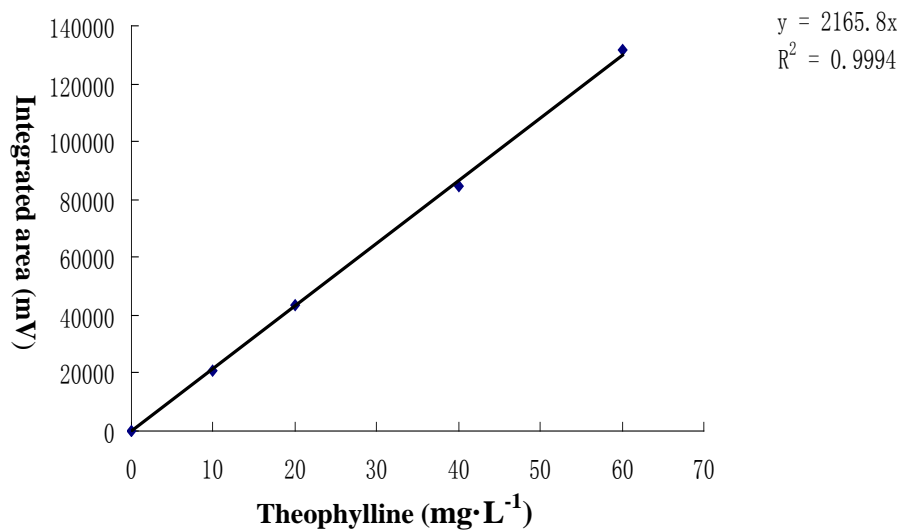

**Fig. S1** Calibration plot of theophylline by HPLC method

Supplement: c2nj40625j.pdf [file c2nj40625j.pdf]
